# Supplementary material
Source: publisher figshare collection journal article supplement (https://tandf.figshare.com/ndownloader/files/1502572)
Supplement: Supplementary file 1 [file 1502572]

**Bis[*N*-alkyl-*N,N*-di(2-pyridylmethyl)amine]zinc(II) perchlorates display *cis*-*facial* stereochemistry in solid state and solution**

J. Tyler Simmons, Zhao Yuan, Kirsten L. Daykin, Brian T. Nguyen, Michael Shatruk, and Lei Zhu\*

Department of Chemistry and Biochemistry, Florida State University, 95 Chieftan Way,  
Tallahassee, FL 32306-4390, USA

[lzhu@chem.fsu.edu](mailto:lzhu@chem.fsu.edu)

**Supporting Information: Additional NMR Spectra (600 MHz, CD<sub>3</sub>CN).**

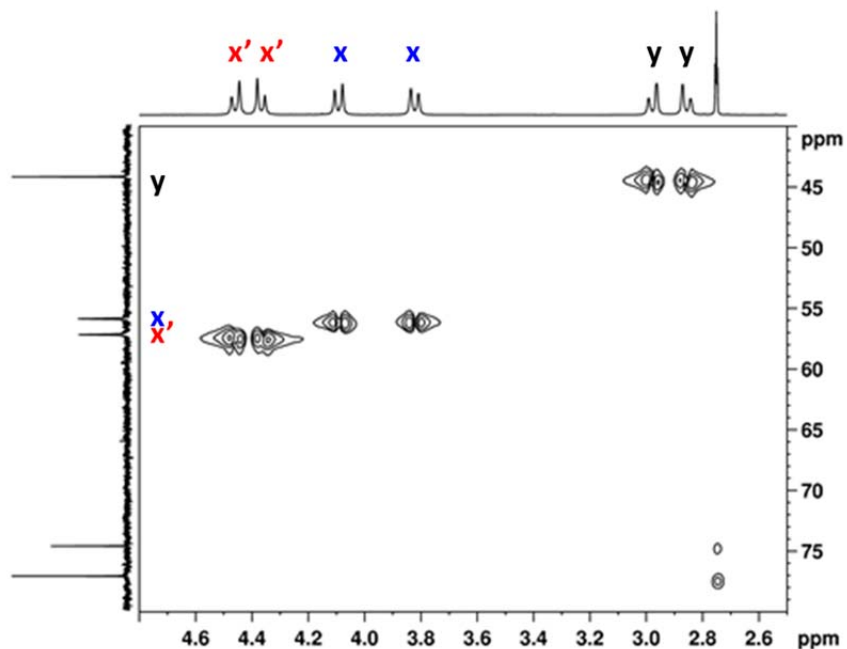

**Figure S1.** HMQC spectrum of [Zn(4)<sub>2</sub>](ClO<sub>4</sub>)<sub>2</sub> expanded in the aliphatic region.

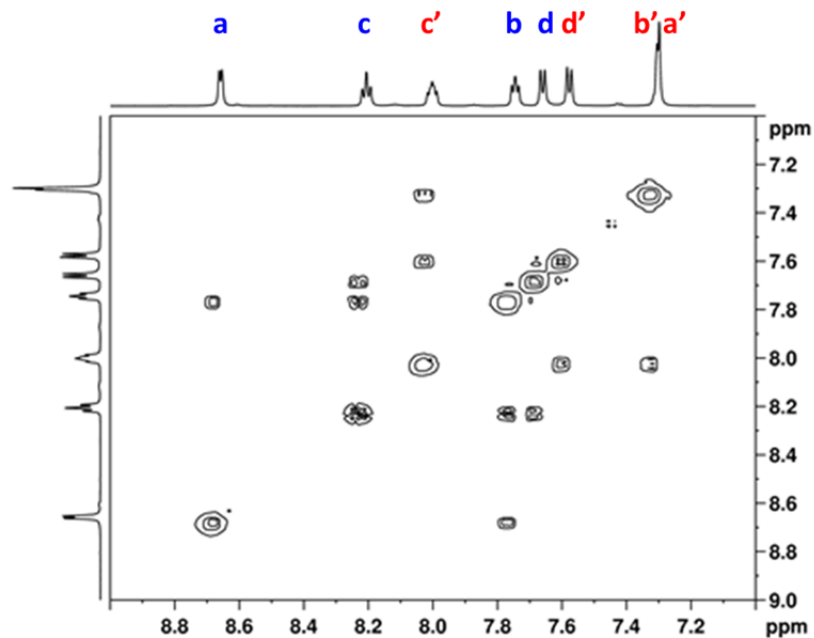

**Figure S2.** COSY spectrum of  $[\text{Zn}(\mathbf{2})_2](\text{ClO}_4)_2$  expanded in the aromatic region.

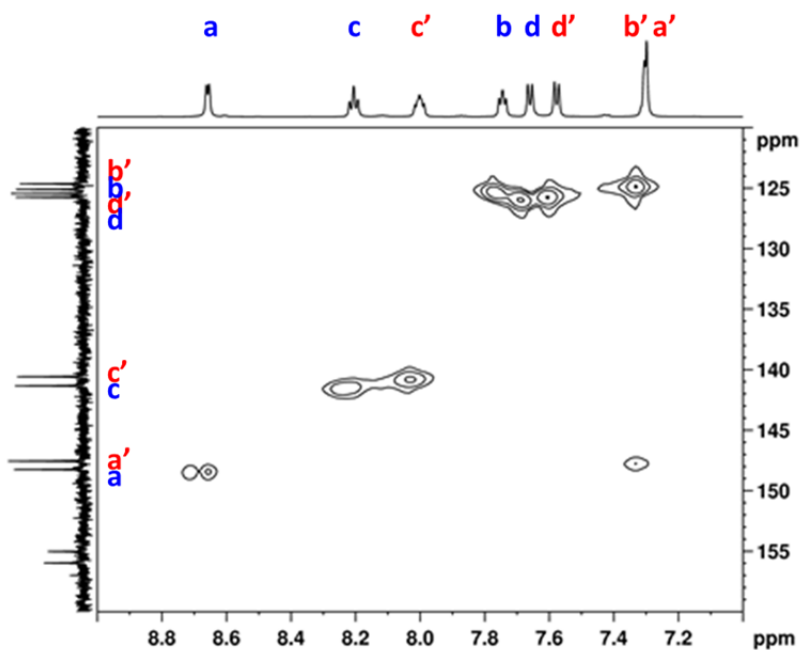

**Figure S3.** HMQC spectrum of  $[\text{Zn}(\mathbf{2})_2](\text{ClO}_4)_2$  expanded in the aromatic region.

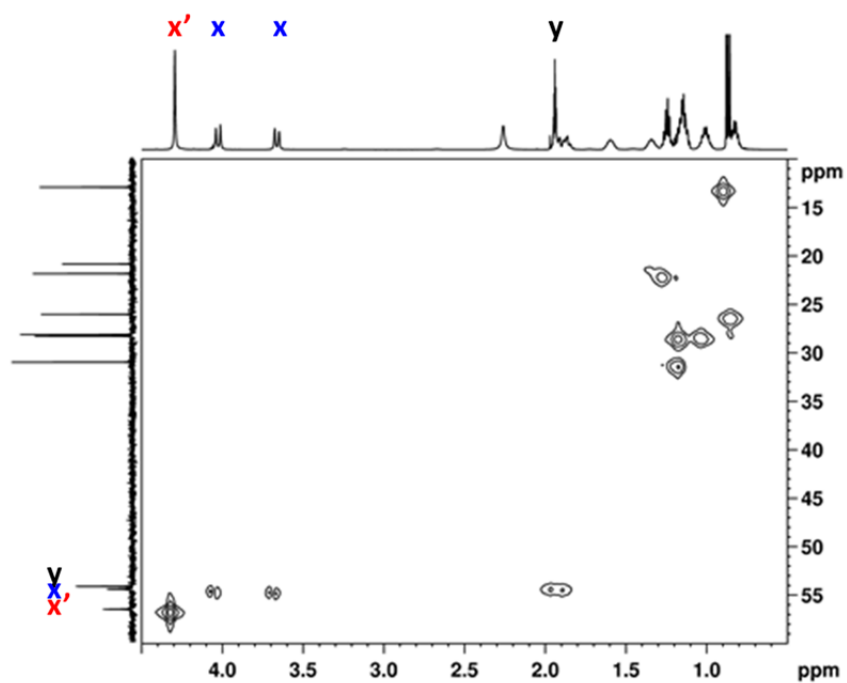

**Figure S4.** HMQC spectrum of  $[\text{Zn}(\mathbf{2})_2](\text{ClO}_4)_2$  expanded in the aliphatic region.

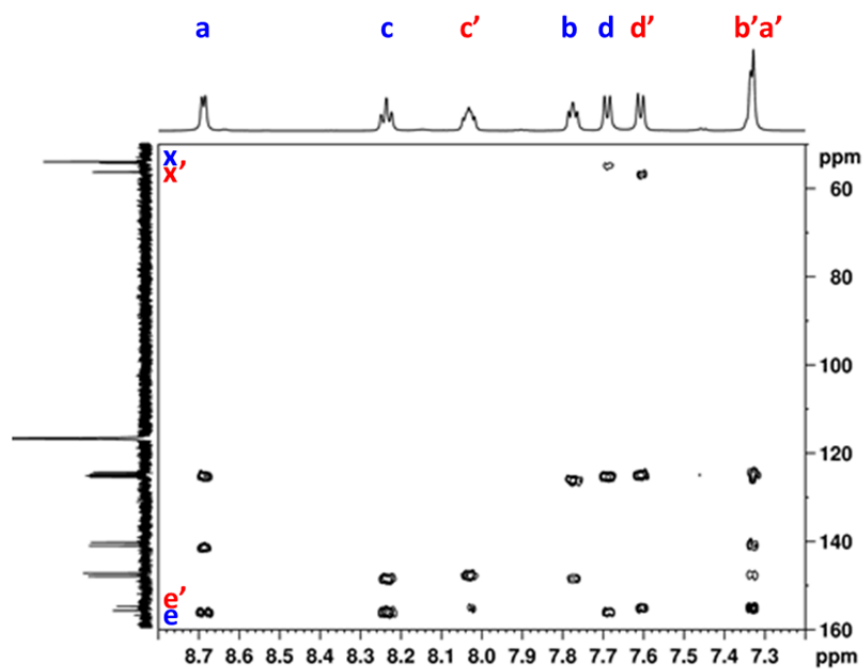

**Figure S5.** HMBC spectrum of  $[\text{Zn}(\mathbf{2})_2](\text{ClO}_4)_2$  showing the aromatic  $^1\text{H}$  to  $^{13}\text{C}$  correlations.

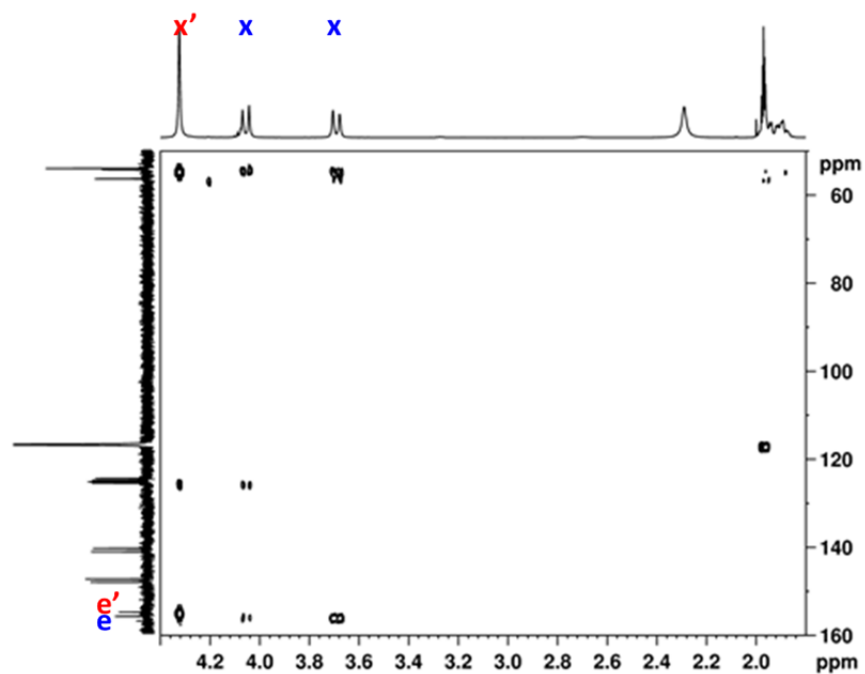

**Figure S6.** HMBC spectrum of  $[\text{Zn}(\mathbf{2})_2](\text{ClO}_4)_2$  showing the aliphatic  $^1\text{H}$  to  $^{13}\text{C}$  correlations.

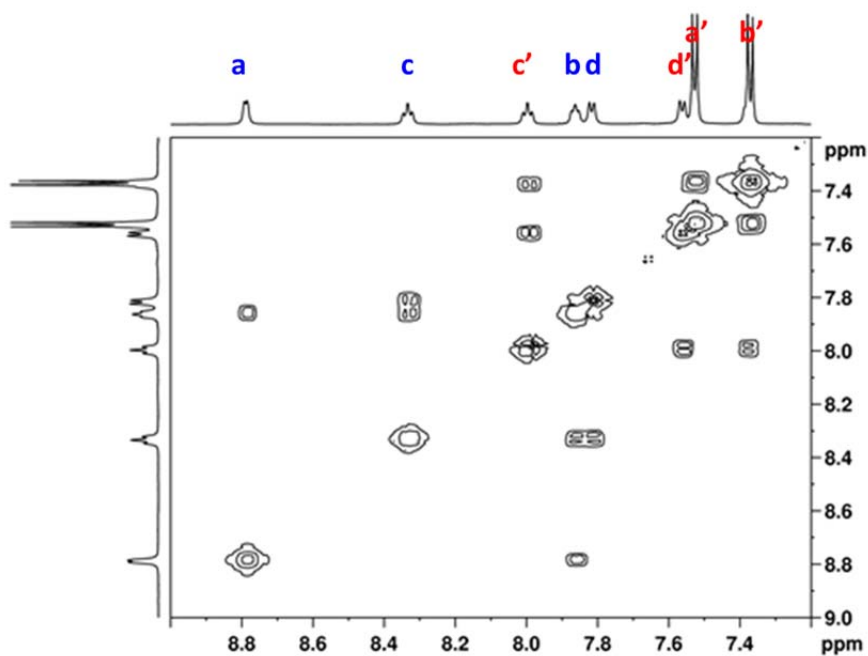

**Figure S7.** COSY spectrum of  $[\text{Zn}(\mathbf{3})_2](\text{ClO}_4)_2$  expanded in the aromatic region.

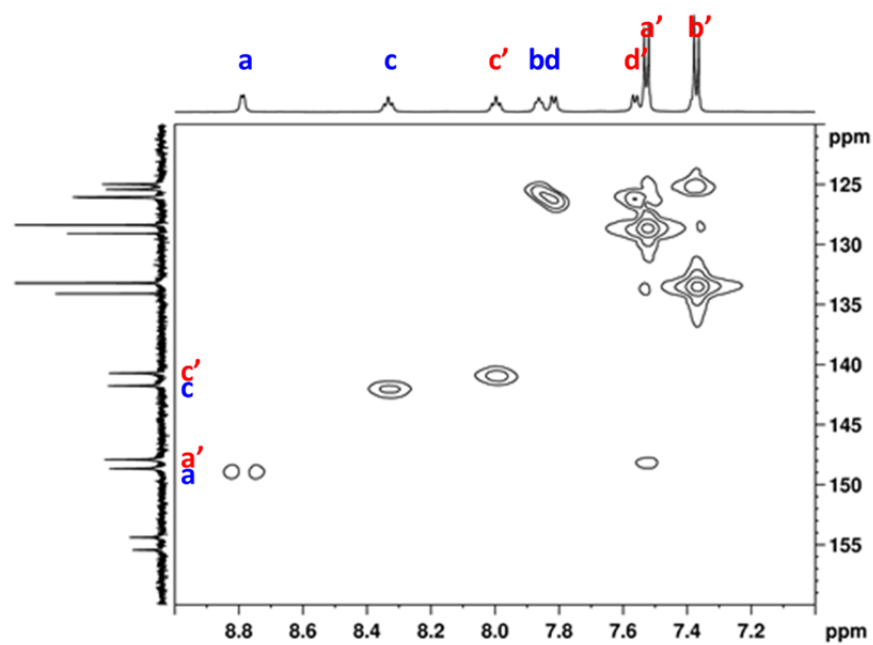

**Figure S8.** HMPC spectrum of  $[\text{Zn}(\mathbf{3})_2](\text{ClO}_4)_2$  expanded in the aromatic region.

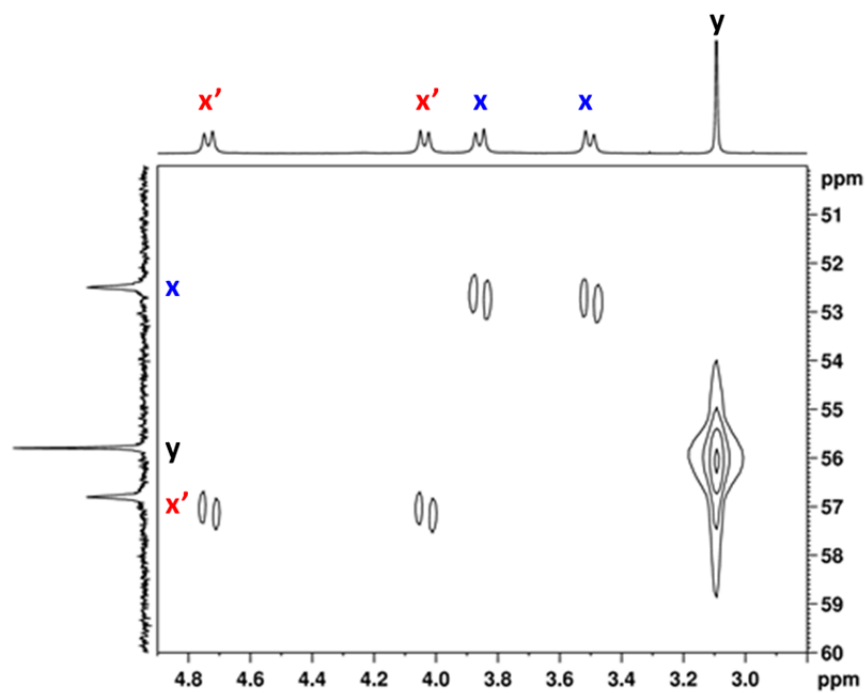

**Figure S9.** HMPC spectrum of  $[\text{Zn}(\mathbf{3})_2](\text{ClO}_4)_2$  expanded in the aliphatic region.

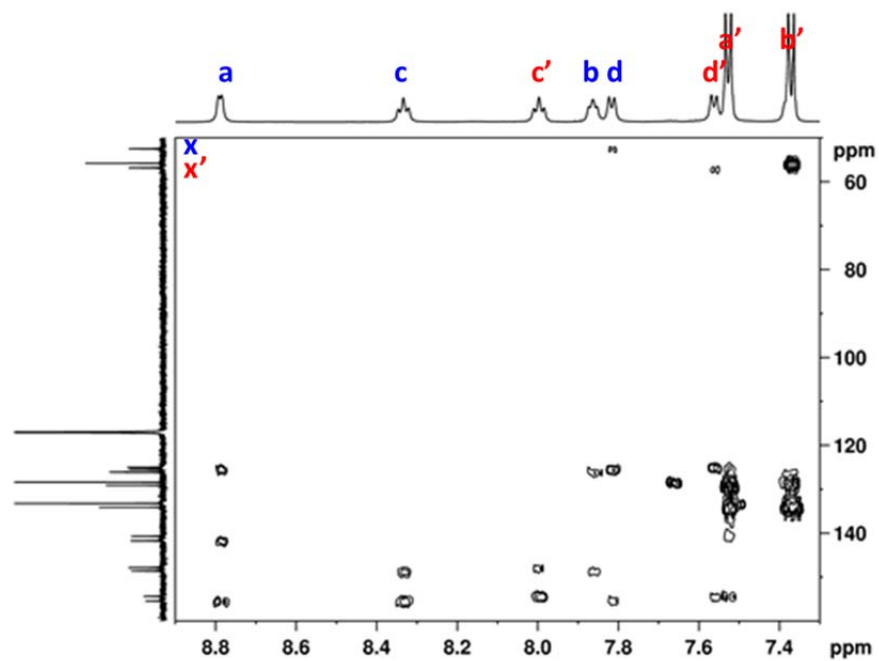

**Figure S10.** HMBC spectrum of  $[\text{Zn}(\mathbf{3})_2](\text{ClO}_4)_2$  showing the aromatic  $^1\text{H}$  to  $^{13}\text{C}$  correlations.

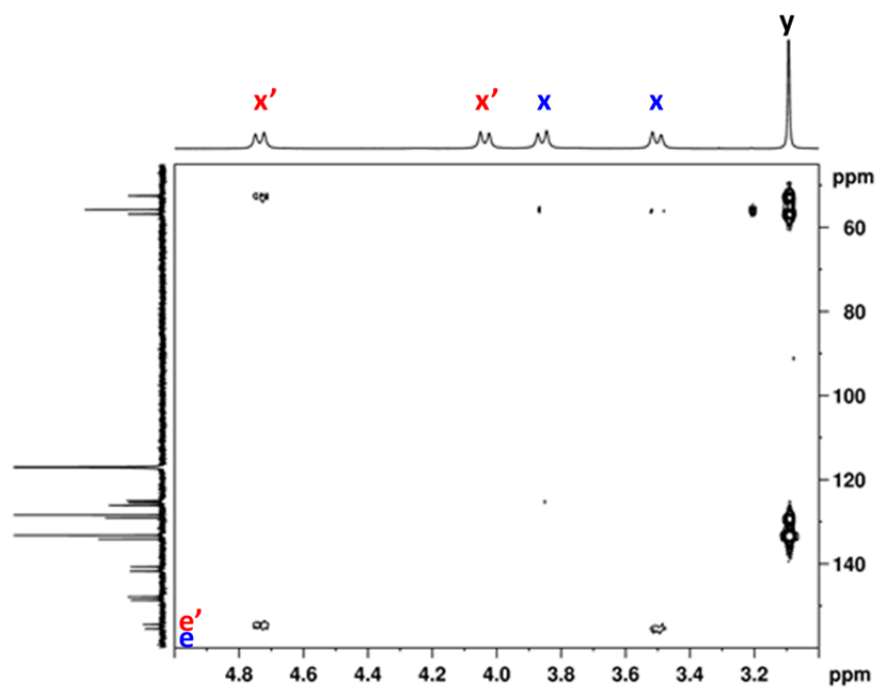

**Figure S11.** HMBC spectrum of  $[\text{Zn}(\mathbf{3})_2](\text{ClO}_4)_2$  showing the aliphatic  $^1\text{H}$  to  $^{13}\text{C}$  correlations.
